# Supplementary material for: Circulating TNF receptor levels are associated with estimated glomerular filtration rate even in healthy individuals with normal kidney function
Source: PubMed Central journal article supplement (PMC10973483; doi:10.1038/s41598-024-57265-x), 2024-03-27
Supplement: 41598_2024_57265_MOESM1_ESM.pdf [file 41598_2024_57265_MOESM1_ESM.pdf]

Supplementary Table 1. Multivariate regression analysis of the factors associated with tumor necrosis factor receptor 1 or tumor necrosis factor receptor 2 in healthy subjects.

| <b>TNFR1</b> |          |        |         |         | <b>TNFR2</b> |          |        |         |         |
|--------------|----------|--------|---------|---------|--------------|----------|--------|---------|---------|
| Variables    | Estimate | SE     | t value | P       | Variables    | Estimate | SE     | t value | P       |
| eGFR-CysC    | -0.0019  | 0.0002 | -8.859  | <0.0001 | eGFR-CysC    | -0.0018  | 0.0002 | -7.782  | <0.0001 |
| eGFR-Cr      | -0.00007 | 0.0003 | -0.229  | 0.82    | eGFR-Cr      | -0.0001  | 0.0004 | -0.290  | 0.77    |
|              |          |        |         |         | Age          | -0.0005  | 0.0004 | -1.047  | 0.30    |
|              |          |        |         |         | Systolic BP  | 0.0006   | 0.0003 | 1.968   | 0.0498  |

Abbreviations: BP, blood pressure; Cr, creatinine; CysC, cystatin C; eGFR, estimated glomerular filtration rate; SE, standard error; TNF, tumor necrosis factor; TNFR, TNF receptor.

Supplementary Table 2. Multivariate regression analysis of the factors associated with tumor necrosis factor receptor 1 or tumor necrosis factor receptor 2 in patients with type 2 diabetes.

| <b>TNFR1</b> |          |        |         |         | <b>TNFR2</b> |          |         |         |         |
|--------------|----------|--------|---------|---------|--------------|----------|---------|---------|---------|
| Variables    | Estimate | SE     | t value | P       | Variables    | Estimate | SE      | t value | P       |
| eGFR-CysC    | -0.0016  | 0.0003 | -5.69   | <0.0001 | eGFR-CysC    | -0.0017  | 0.0003  | -6.01   | <0.0001 |
| eGFR-Cr      | -0.0006  | 0.0004 | -1.48   | 0.14    | eGFR-Cr      | -0.0003  | 0.0004  | -0.66   | 0.51    |
| Age          | 0.0004   | 0.0007 | 0.56    | 0.57    | Age          | 0.0011   | 0.0007  | 1.48    | 0.14    |
| BMI          | 0.0013   | 0.0013 | 1.06    | 0.29    | HbA1c        | 0.0122   | 0.00535 | 2.27    | 0.02    |
| HbA1c        | 0.0191   | 0.0049 | 3.9     | 0.0001  | Uric acid    | 0.0128   | 0.0052  | 2.45    | 0.01    |
| Uric acid    | 0.0175   | 0.0048 | 3.52    | 0.0003  | HDL-C        | -0.0023  | 0.0005  | -4.4    | <0.0001 |
| Non-HDL-C    | -0.0004  | 0.0002 | -2.41   | 0.02    | Non-HDL-C    | -0.0005  | 0.0002  | -2.8    | 0.006   |
| UACR         | 0.0482   | 0.0086 | 5.62    | <0.0001 | UACR         | 0.0345   | 0.0091  | 3.78    | 0.0002  |

Abbreviations used in this table are the same as in Supplementary Table 1.

Abbreviations: BMI, body mass index; HbA1c, glycated hemoglobin; HDL-C, high-density-lipoprotein cholesterol; UACR, urinary albumin-to-creatinine ratio.

Supplementary Table 3. Spearman's correlation between tumor necrosis factor receptors and clinical parameters in healthy subjects and patients with type 2 diabetes.

| Variables    | Healthy subjects and diabetes (n = 705) |                      |
|--------------|-----------------------------------------|----------------------|
|              | TNFR1                                   | TNFR2                |
| Age          | 0.37 <sup>***</sup>                     | 0.45 <sup>***</sup>  |
| BMI          | 0.34 <sup>***</sup>                     | 0.33 <sup>***</sup>  |
| Systolic BP  | 0.35 <sup>***</sup>                     | 0.39 <sup>***</sup>  |
| Diastolic BP | 0.25 <sup>***</sup>                     | 0.30 <sup>***</sup>  |
| HbA1c        | 0.52 <sup>***</sup>                     | -0.57 <sup>***</sup> |
| HDL-C        | -0.33 <sup>***</sup>                    | -0.35 <sup>***</sup> |
| Non-HDL-C    | -0.07                                   | -0.09 <sup>*</sup>   |
| Uric acid    | 0.11 <sup>**</sup>                      | 0.09 <sup>*</sup>    |
| UACR         | 0.42 <sup>**</sup>                      | 0.44 <sup>***</sup>  |
| GFR-Cr       | -0.10 <sup>**</sup>                     | -0.10 <sup>**</sup>  |
| GFR-CysC     | -0.43 <sup>***</sup>                    | -0.43 <sup>***</sup> |
| TNFR2        | 0.81 <sup>***</sup>                     | —                    |

\* p<0.05, \*\* p<0.01, \*\*\* p<0.001

Abbreviations used in this table are the same as in Supplementary Table 1 and Table 2.

Supplementary Table 4. Multivariate stepwise regression analysis of the factors associated with tumor necrosis factor 1 or tumor necrosis factor 2 in healthy subjects and patients with type 2 diabetes.

| <b>TNFR1</b> |          |         |         |         | <b>TNFR2</b> |          |          |         |         |
|--------------|----------|---------|---------|---------|--------------|----------|----------|---------|---------|
| Variables    | Estimate | SE      | t value | P       | Variables    | Estimate | SE       | t value | P       |
| BMI          | 0.0013   | 0.0009  | 1.466   | 0.14    | Age          | 0.0010   | 0.0004   | 2.833   | 0.005   |
| HbA1c        | 0.0025   | 0.0034  | 7.422   | <0.0001 | HbA1c        | 0.0294   | 0.0037   | 7.850   | <0.0001 |
| HDL-C        | -0.0008  | 0.00023 | -3.520  | 0.0005  | HDL-C        | -0.0008  | 0.000247 | -3.381  | <0.0001 |
| Non-HDL      | -0.0005  | 0.0001  | -4.645  | <0.0001 | Non-HDL      | -0.0006  | 0.0001   | -5.535  | <0.0001 |
| Uric acid    | 0.0094   | 0.0029  | 3.210   | <0.0001 | Uric acid    | 0.0104   | 0.0031   | 3.379   | 0.0008  |
| eGFR-CysC    | -0.0019  | 0.0002  | -11.622 | <0.0001 | SBP          | 0.0004   | 0.0002   | 1.782   | 0.08    |
| eGFR-Cr      | -0.0005  | 0.0002  | -2.095  | 0.04    | eGFR-CysC    | -0.0019  | 0.0002   | -9.894  | <0.0001 |
| ACR          | 0.0441   | 0.0068  | 6.444   | <0.0001 | ACR          | 0.0383   | 0.00752  | 5.087   | <0.0001 |

Abbreviations used in this table are the same as in Supplementary Table 1 and Table 2.

Supplementary Table 5. TNFR levels in patients with diabetes.

| Author                   | Type of diabetes | n    | Trial, study, and/or ethnicity         | Age (yrs)   | HbA1c (%)       | eGFR-Cr or mGFR (mL/min/1.73 m <sup>2</sup> ) | eGFR-CysC (mL/min/1.73 m <sup>2</sup> ) | Median UACR or UAER** | TNFR1 (pg/mL)     | TNFR2 (pg/mL)     | Vendor (ELISA Cat. No.)***   | References                           |
|--------------------------|------------------|------|----------------------------------------|-------------|-----------------|-----------------------------------------------|-----------------------------------------|-----------------------|-------------------|-------------------|------------------------------|--------------------------------------|
| Gohda T, et al.          | 2                | 292  | Japanese                               | 57±11       | 7.5±1.2         | 85±19                                         | 97±23                                   | 18 (7, 59) mg/gCr     | 1357 (1133, 1646) | 2904 (2505, 3391) | R&D Systems (DRT100, DRT200) | Present study                        |
| Kamei N, et al. [12]     | 2                | 594  | Japanese                               | 55±13       | 7.3±1.2         | 69 (56, 84)                                   | —                                       | 22 (9, 123) mg/gCr    | 1562 (1263, 2016) | 3339 (2717, 4297) | R&D Systems (DRT100, DRT200) | Sci Rep. 8: 15302, 2018.             |
| Murakoshi M, et al. [10] | 2                | 201  | Japanese                               | 67±10       | 7.2±1.0         | 73±25                                         | —                                       | 23 (8, 142) mg/gCr    | 1412 (1153, 1902) | Not measured      | R&D Systems (DRT100)         | Front Endocrinol. 13: 849457, 2022.  |
| Saulnier PJ, et al. [28] | 2                | 1135 | SURDIAGENE study, French               | 64±11       | 7.8±1.5         | 76±21                                         | —                                       | 23 (9, 92) mg/gCr     | 1818 (1544, 2231) | Not measured      | EKF Diagnostics (BIO94TNFR1) | Diabetes Care. 40: 367-374, 2017.    |
| Oshima M, et al. [29]    | 2                | 330  | ADVANCE and ADVANCE-ON studies         | 68±7        | 7.6±1.6         | 67±16                                         | —                                       | 15 (7, 37) mg/gCr     | 1429 (1150, 1760) | Not measured      | R&D Systems (DRT100)         | KI Report. 6: 284-295, 2021.         |
| Pavkov ME, et al. [24]   | 2                | 83   | Pima Indians                           | 46±10       | 9.2 (7.6, 11.2) | 119 (94, 155)*                                | —                                       | 26 (12, 127) mg/gCr   | 1500 (1205, 1960) | 3283 (2670, 4151) | R&D Systems (DRT100, DRT200) | Kidney Int. 89: 226-234, 2016.       |
| Pavkov ME, et al. [30]   | 2                | 193  | Pima Indians                           | 46 (39, 53) | 9.6 (7.7, 11.1) | 120 (88, 149)*                                | —                                       | 72 (19, 493) mg/gCr   | 2833 (2081, 4092) | 4835 (3875, 6997) | R&D Systems (DRT100, DRT200) | Kidney Int. 87: 812-819, 2015.       |
| Gohda T, et al. [6]      | 1                | 275  | First Joslin Kidney Study, Caucasians  | 31±8        | 8.9±1.5         | —                                             | 133±30                                  | 56 (37, 101) µg/min** | 1345 (1156, 1598) | 2161 (1732, 2673) | R&D Systems (DRT100, DRT200) | J Am Soc Nephrol. 23: 516-524, 2012. |
| Gohda T, et al. [6]      | 1                | 353  | Second Joslin Kidney Study, Caucasians | 39±12       | 8.4±1.3         | —                                             | 129±30                                  | 41 (24, 79) µg/min**  | 1382 (1180, 1709) | 2230 (1869, 2695) | R&D Systems (DRT100, DRT200) | J Am Soc Nephrol. 23: 516-524, 2012. |

Abbreviations used in this table are the same as in Supplementary table 1.

Data are presented as mean ± standard deviation (SD) or median (quartiles). n, number of patients; \*mGFR, measured GFR (urinary clearance of nonradioactive iothalamate); \*\*AER (mg/min), albumin excretion rate

\*\*\*DRT100 (R&D Systems) and BIO94TNFR1 (EKF Diagnostics) are the same ELISA kit, although the vendor is different.

# Supplementary Figure 1

## Healthy subjects

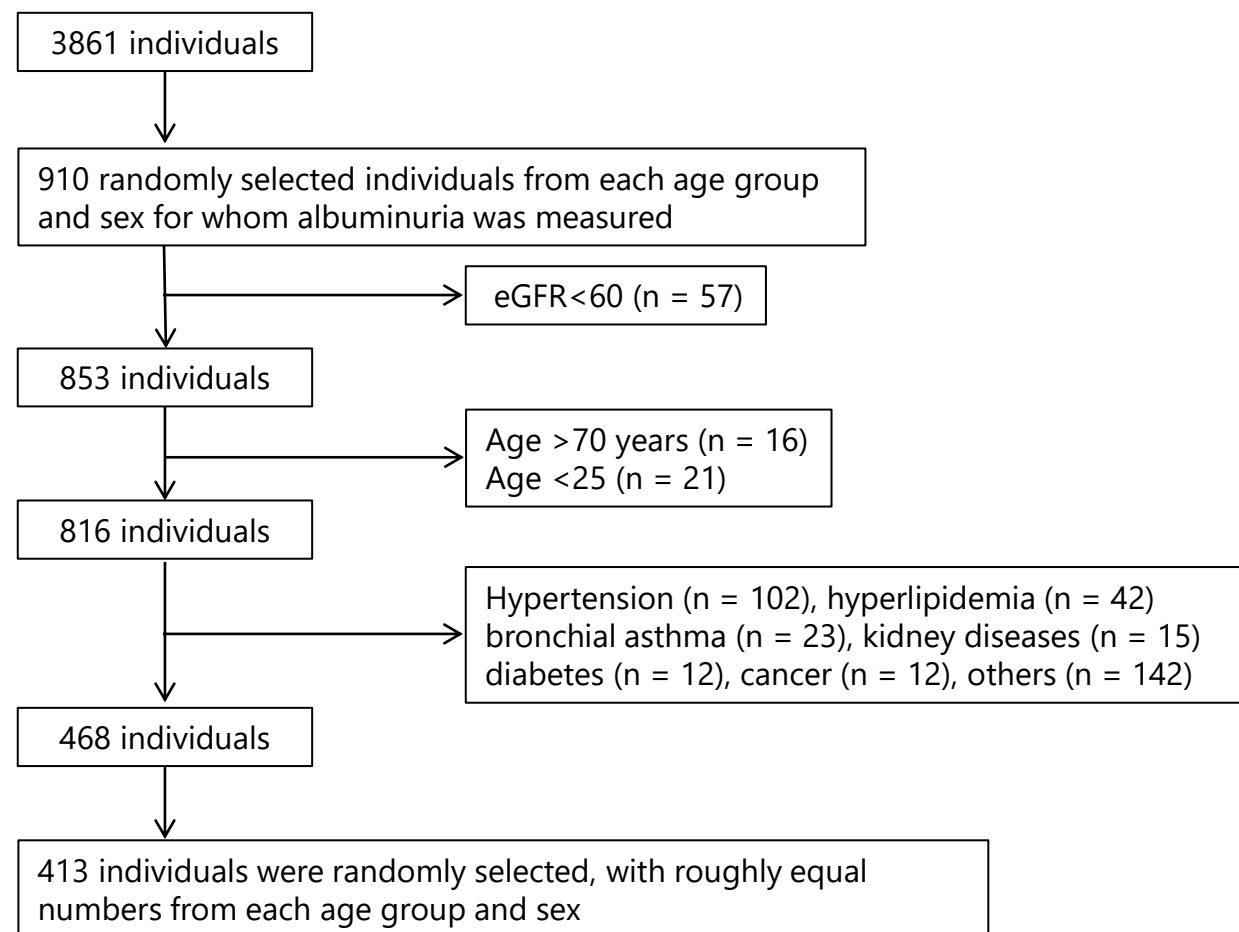

## Type 2 diabetes

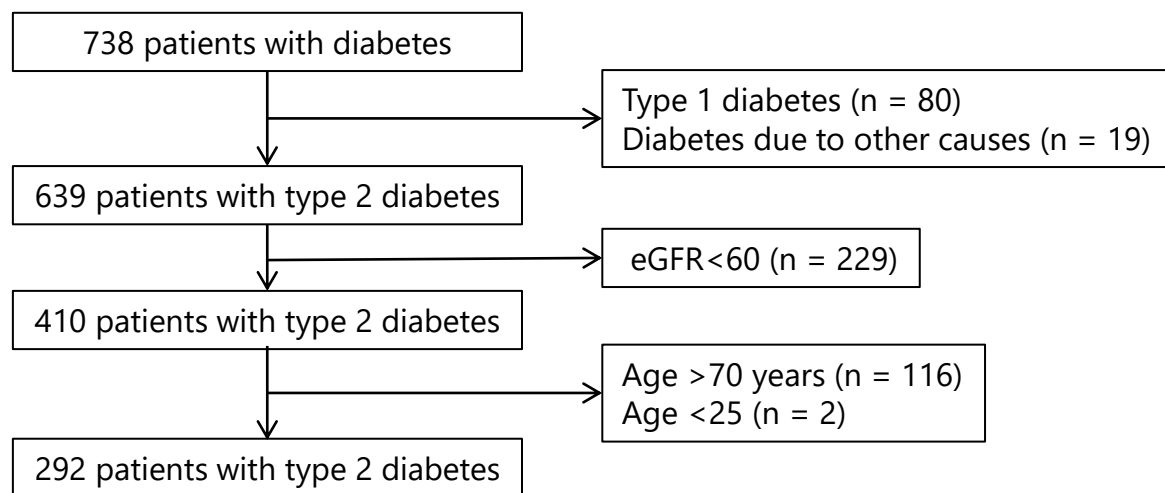

**Figure legend**

**Supplementary Figure 1.** Flowchart of inclusion and exclusion of subjects in this study.
